# Supplementary material
Source: Springer Nature journal article supplement (https://www.springermedizin.de/resource/supplementary/13256_2014_2961_MOESM2_ESM.pdf/9650938)
Supplement: MOESM2 [file 9650938]

## Relation between FiO<sub>2</sub> and Oxygen Flow

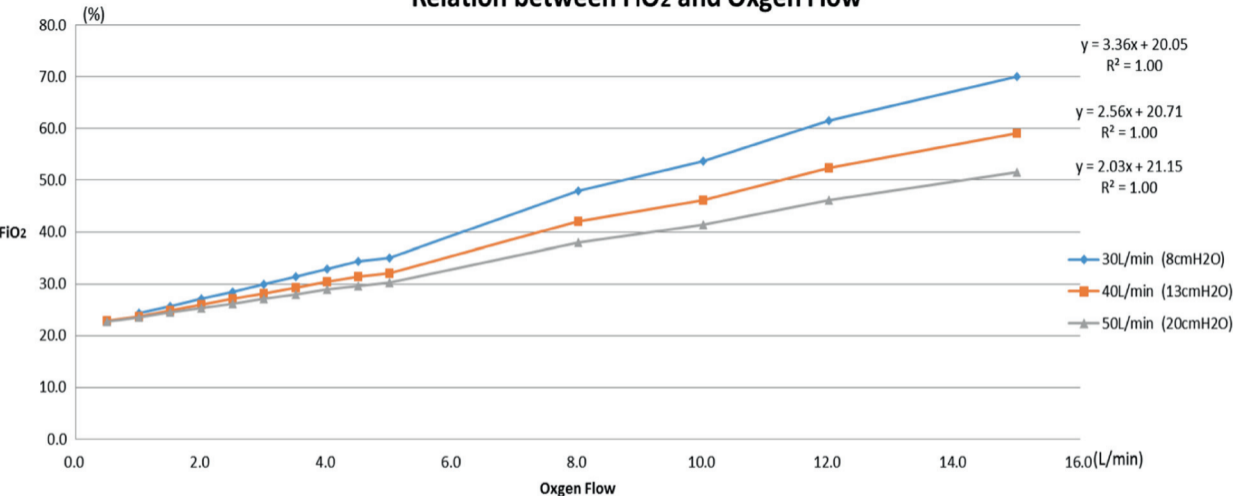

| Air flow (CPAP pressure)       | 0.5  | 1.0  | 1.5  | 2.0  | 2.5  | 3.0  | 3.5  | 4.0  | 4.5  | 5.0  | 8.0  | 10.0 | 12.0 | 15.0 |
|--------------------------------|------|------|------|------|------|------|------|------|------|------|------|------|------|------|
| 30L/min (8cmH <sub>2</sub> O)  | 23.1 | 24.4 | 25.7 | 27.2 | 28.5 | 30.0 | 31.5 | 32.9 | 34.3 | 35.1 | 48.0 | 53.6 | 61.5 | 70.0 |
| 40L/min (13cmH <sub>2</sub> O) | 22.9 | 23.8 | 24.9 | 26.1 | 27.1 | 28.2 | 29.3 | 30.4 | 31.5 | 32.1 | 42.0 | 46.2 | 52.4 | 59.0 |
| 50L/min (20cmH <sub>2</sub> O) | 22.8 | 23.6 | 24.5 | 25.4 | 26.2 | 27.1 | 28.0 | 28.9 | 29.7 | 30.2 | 37.9 | 41.4 | 46.2 | 51.5 |
